# Supplementary material
Source: Springer Nature journal article supplement (https://www.springermedizin.de/resource/supplementary/12889_2012_4160_MOESM1_ESM.pdf/9492212)
Supplement: MOESM1 [file 9492212]

Records identified through database searching  
(N = 2538)

Records screened  
(N = 2538)

Records excluded  
(N = 1781)

Full-text articles assessed  
for eligibility  
(N = 757)

Full-text articles  
excluded  
(N = 747)

Reviews included  
(N = 10)
